# Supplementary material for: Understanding proton capture and cation-induced dimerization of [Ag29(BDT)12]3−clusters by ion mobility mass spectrometry
Source: Royal Society of Chemistry journal article supplement (doi:10.1039/c7cp08181b), 2018-01-01
Supplement: c7cp08181b1.pdf [file c7cp08181b1.pdf]

## Electronic Supplementary Information

### Understanding proton capture and cation-induced dimerization of $[\text{Ag}_{29}(\text{BDT})_{12}]^{3-}$ clusters by ion mobility mass spectrometry

Papri Chakraborty,<sup>a,‡</sup> Ananya Baksi,<sup>a,‡,+</sup> Sathish Kumar Mudedla,<sup>b</sup> Abhijit Nag,<sup>a</sup> Ganesan Paramasivam,<sup>a</sup> Venkatesan Subramanian<sup>b</sup> and Thalappil Pradeep<sup>\*a</sup>

<sup>a</sup> DST Unit of Nanoscience (DST UNS) and Thematic Unit of Excellence, Department of Chemistry, Indian Institute of Technology Madras, Chennai 600036, India.

\*E-mail: pradeep@iitm.ac.in

<sup>b</sup>Chemical Laboratory, CSIR-Central Leather Research Institute, Adyar, Chennai 600020, India

#### Table of contents

| Name    | Description                                                                                                                                                          | Page No. |
|---------|----------------------------------------------------------------------------------------------------------------------------------------------------------------------|----------|
| Fig. S1 | UV-vis and ESI MS characterization of $[\text{Ag}_{29}(\text{BDT})_{12}]^{3-}$ cluster                                                                               | 4        |
| Fig. S2 | ESI MS showing conversion of $[\text{Ag}_{29}(\text{BDT})_{12}]^{3-}$ to $[\text{Ag}_{29}(\text{BDT})_{12}\text{H}]^{2-}$ at different concentrations of formic acid | 5        |
| Fig. S3 | Comparison of isotope patterns of $[\text{Ag}_{29}(\text{BDT})_{12}]^{2-}$ and $[\text{Ag}_{29}(\text{BDT})_{12}\text{H}]^{2-}$                                      | 6        |
| Fig. S4 | Detection of $[\text{Ag}_{29}(\text{BDT})_{12}\text{H}]^{2-}$ by increasing polarity of solvents                                                                     | 6        |
| Fig. S5 | Reactivity of $[\text{Ag}_{29}(\text{BDT})_{12}]^{3-}$ with $\text{NMe}_4\text{Br}$                                                                                  | 7        |

|          |                                                                                                                                                                        |    |
|----------|------------------------------------------------------------------------------------------------------------------------------------------------------------------------|----|
| Fig. S6  | UV-vis spectra of $[\text{Ag}_{29}(\text{BDT})_{12}]^{3-}$ cluster in presence of different concentration of formic acid and $\text{NH}_4\text{OAc}$                   | 7  |
| Fig. S7  | MS/MS of $[\text{Ag}_{29}(\text{BDT})_{12}\text{H}]^{2-}$                                                                                                              | 8  |
| Fig. S8  | ESI MS under soft ionization conditions showing the formation of intact $[\text{Ag}_{29}(\text{BDT})_{12}(\text{TPP})_n\text{H}]^{2-}$ ( $n=1-4$ ) clusters.           | 9  |
| Fig. S9  | Structure of $[\text{Ag}_{29}(\text{BDT})_{12}]^{3-}$ showing different types of S atoms in the outer shell of the cluster                                             | 9  |
| Fig. S10 | DFT optimized possible structures of $[\text{Ag}_{29}(\text{BDT})_{12}\text{H}]^{2-}$                                                                                  | 10 |
| Fig. S11 | DFT optimized structure of $[\text{Ag}_{29}(\text{BDT})_{12}\text{H}(\text{TPP})_4]^{2-}$                                                                              | 11 |
| Fig. S12 | DFT optimized structure of $[\text{Ag}_{29}(\text{BDT})_{12}\text{H}_2]^{-}$                                                                                           | 11 |
| Fig. S13 | MS/MS of $[\text{Ag}_{29}(\text{BDT})_{12}\text{M}]^{2-}$ ( $\text{M}=\text{Na}, \text{K}, \text{Cs}$ )                                                                | 12 |
| Fig. S14 | ESI MS under soft ionization conditions showing the formation of intact $[\text{Ag}_{29}(\text{BDT})_{12}(\text{TPP})_n\text{K}]^{2-}$ ( $n=1-4$ ) clusters.           | 13 |
| Fig. S15 | DFT optimized possible structures of $[\text{Ag}_{29}(\text{BDT})_{12}\text{Cs}]^{2-}$                                                                                 | 13 |
| Fig. S16 | Experimental and calculated isotope patterns of the dimers $[\text{Ag}_{29}(\text{BDT})_{12}\text{M}]_2^{4-}$ ( $\text{M}=\text{Na}, \text{K}, \text{Rb}, \text{Cs}$ ) | 14 |
| Fig. S17 | Drift time profile of $[\text{Ag}_{29}(\text{BDT})_{12}]^{3-}$                                                                                                         | 15 |
| Fig. S18 | DFT optimized structure of $[\text{Ag}_{29}(\text{BDT})_{12}\text{H}]^{2-}$ with H sandwiched between the two benzene rings of the BDT ligands.                        | 15 |

|          |                                                                                        |       |
|----------|----------------------------------------------------------------------------------------|-------|
| Fig. S19 | Experimental CCS values of the monomers and the dimers                                 | 16    |
| Fig. S20 | CID of the dimers $[\text{Ag}_{29}(\text{BDT})_{12}\text{M}]_2^{4-}$ (M=Na, K, Rb, Cs) | 17    |
|          | Cartesian co-ordinates of the DFT optimized lowest energy structures                   | 18-34 |

## Supplementary Information 1

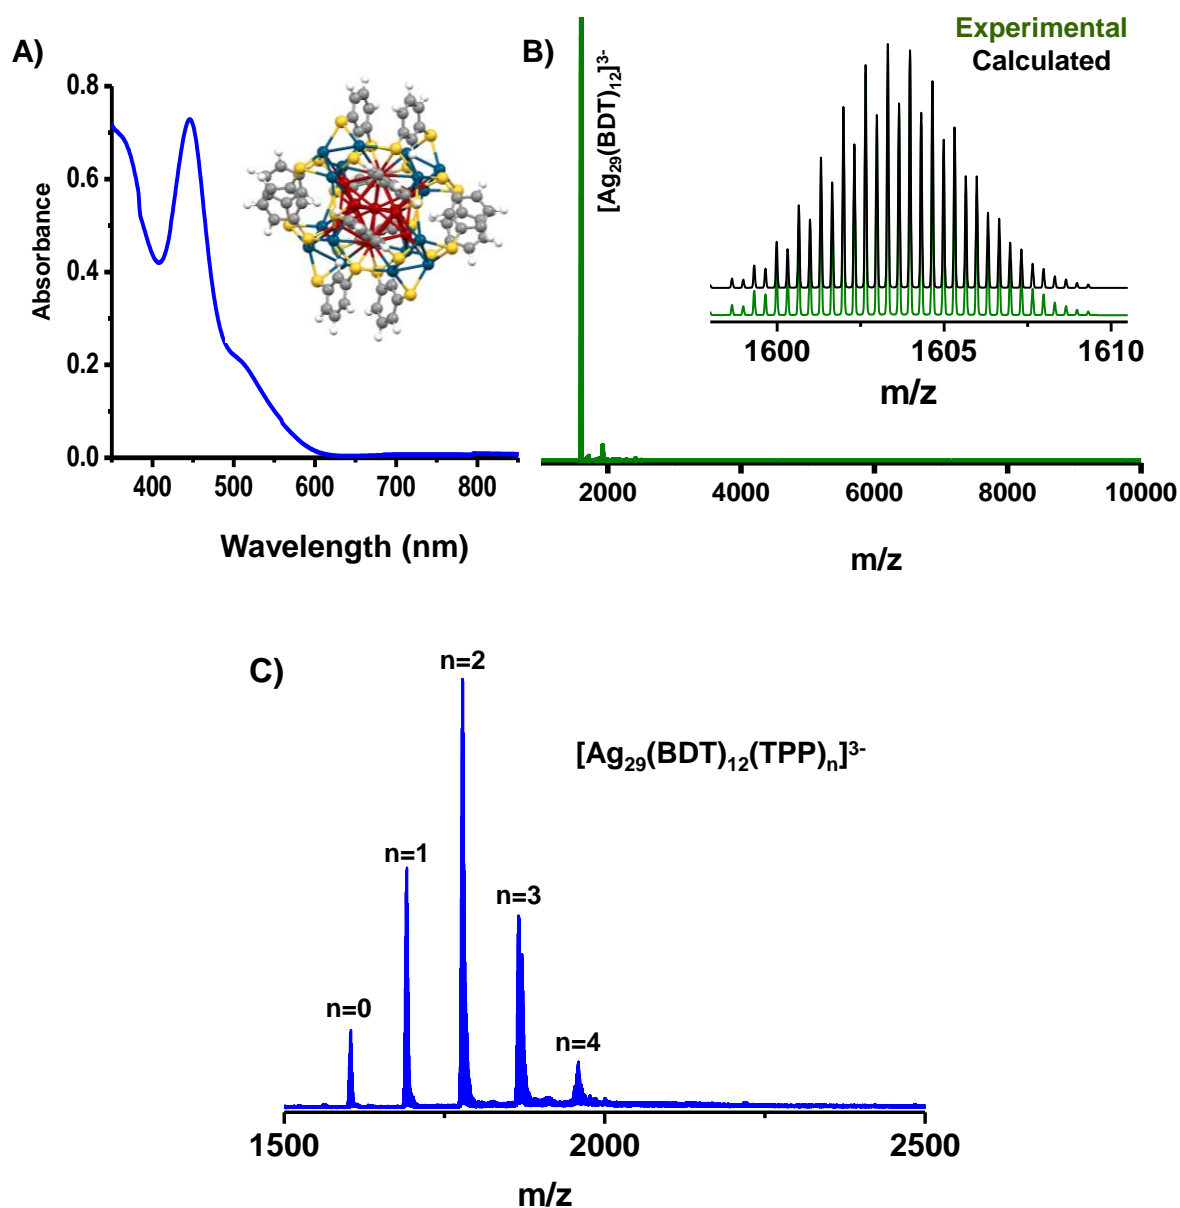

**Fig. S1** A) UV-vis of  $[\text{Ag}_{29}(\text{BDT})_{12}(\text{TPP})_4]^{3-}$  cluster, B) ESI MS of  $[\text{Ag}_{29}(\text{BDT})_{12}]^{3-}$ , the TPP ligands are lost during the ionization. Inset of B) shows the experimental and calculated isotope patterns of  $[\text{Ag}_{29}(\text{BDT})_{12}]^{3-}$ . The structure of  $[\text{Ag}_{29}(\text{BDT})_{12}]^{3-}$  is shown in the inset of A). C) ESI MS under the soft ionization conditions showing the intact  $[\text{Ag}_{29}(\text{BDT})_{12}(\text{TPP})_n]^{3-}$  ( $n=1-4$ ) clusters. Color codes: red: Ag atoms of the core; blue: Ag atoms of the staples; yellow: S; grey: C and white: H. The structure has been modelled taking the co-ordinates of its crystal structure.

## Supplementary Information 2

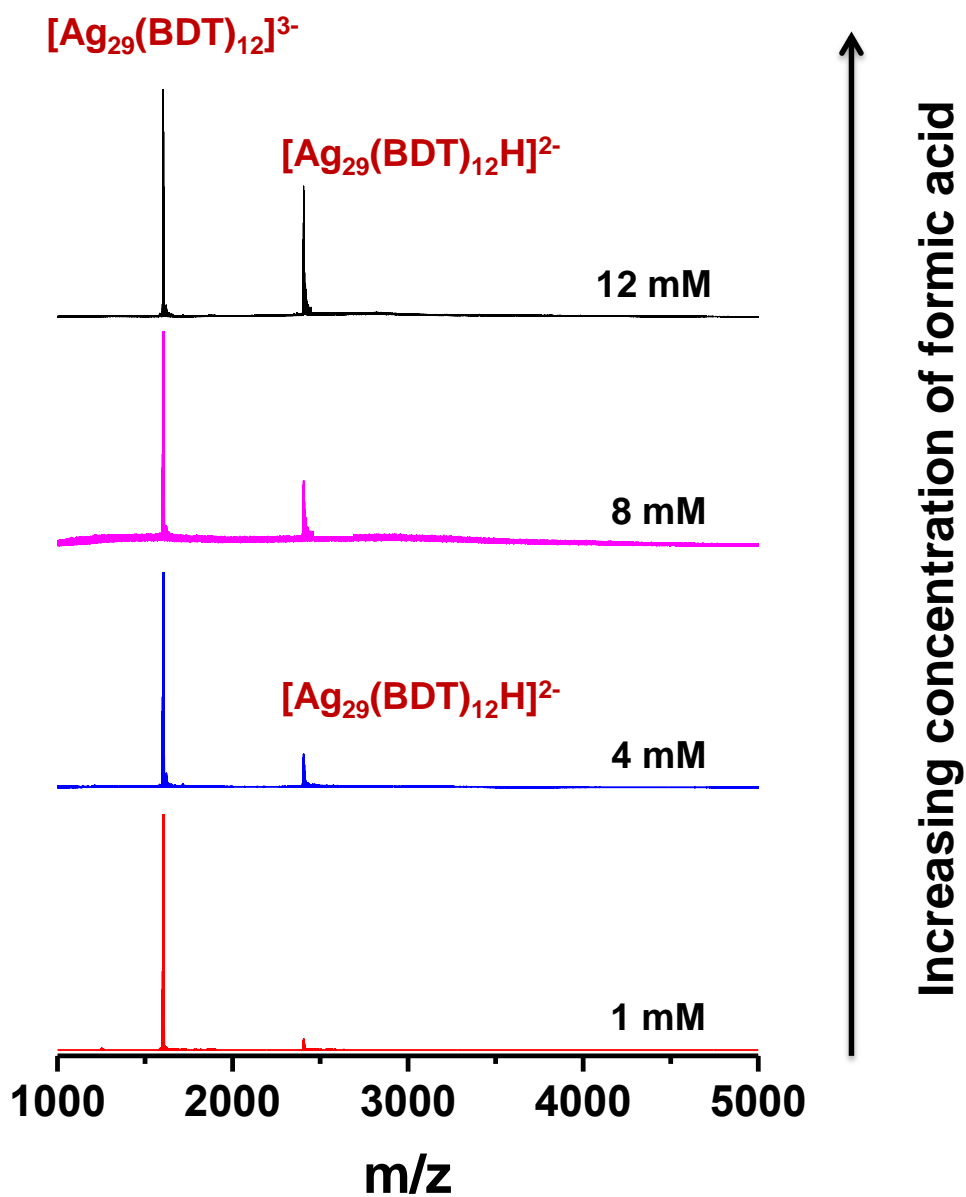

**Fig. S2** ESI MS showing increase in the peak of  $[Ag_{29}(BDT)_{12}H]^{2-}$  with increase in the concentration of formic acid. Formic acid concentration (mM) is indicated in the figure.

### Supplementary Information 3

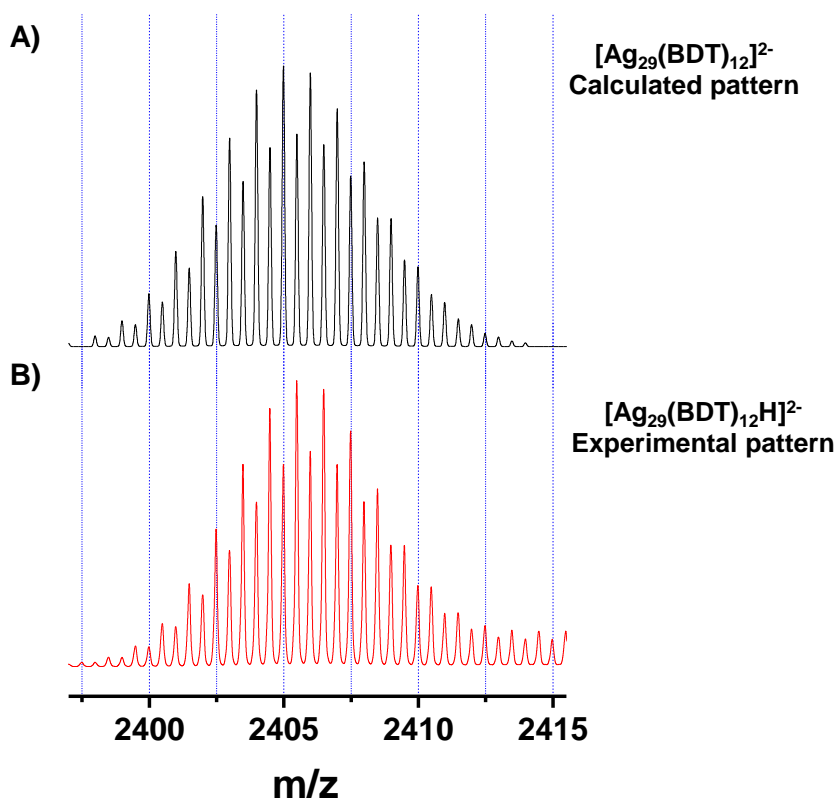

**Fig. S3** A) Calculated isotope patterns of  $[\text{Ag}_{29}(\text{BDT})_{12}]^{2-}$  and B) experimental isotope pattern of  $[\text{Ag}_{29}(\text{BDT})_{12}\text{H}]^{2-}$ . The isotope patterns show the difference between the two species. Experimental spectrum in the higher mass region overlaps with other features.

### Supplementary Information 4

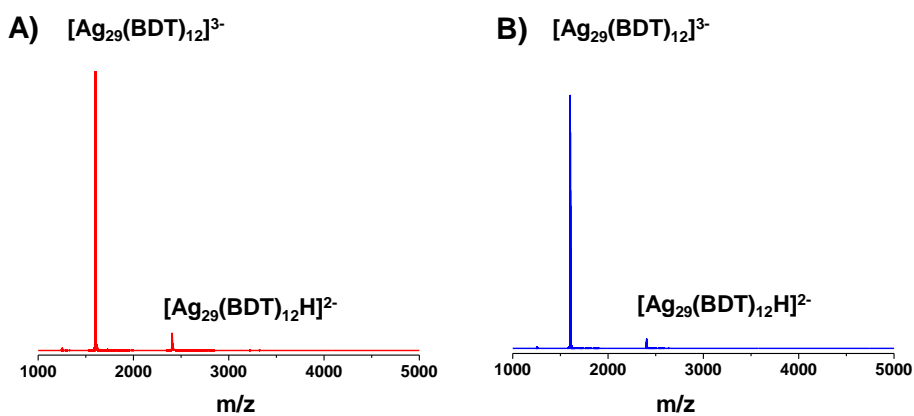

**Fig. S4** ESI MS of  $[\text{Ag}_{29}(\text{BDT})_{12}]^{3-}$  in A) 1:1 DMF/MeOH mixture and B) DMF with one drop of  $\text{H}_2\text{O}$  added as the  $\text{H}^+$  source. Peak for  $[\text{Ag}_{29}(\text{BDT})_{12}\text{H}]^{2-}$  was detected in both cases.

## Supplementary Information 5

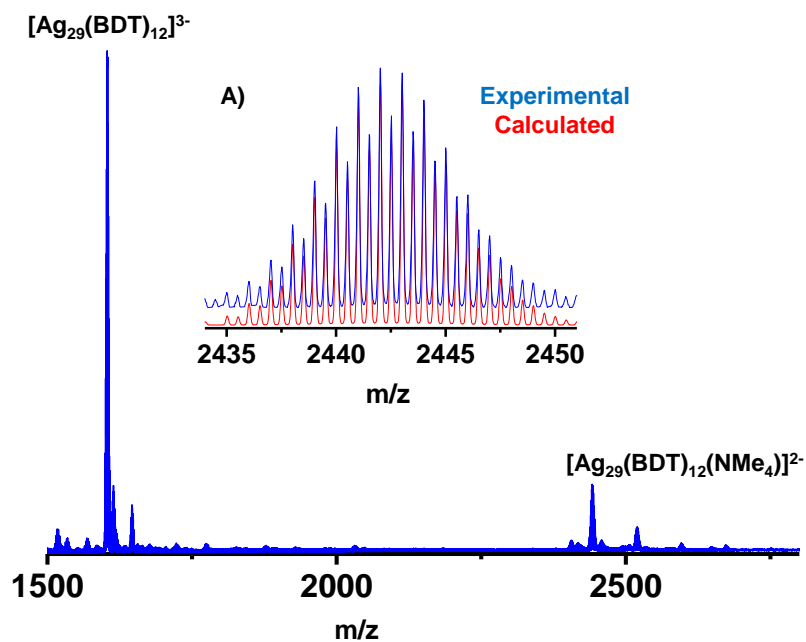

**Fig. S5** ESI MS of  $[Ag_{29}(BDT)_{12}]^{3-}$  cluster in presence of  $NMe_4Br$ . The cluster shows complexation with  $NMe_4^+$  and hence a peak for the complex  $[Ag_{29}(BDT)_{12}(NMe_4)]^{2-}$ . Inset A) shows the comparison of experimental and calculated isotope patterns of  $[Ag_{29}(BDT)_{12}(NMe_4)]^{2-}$ .

## Supplementary Information 6

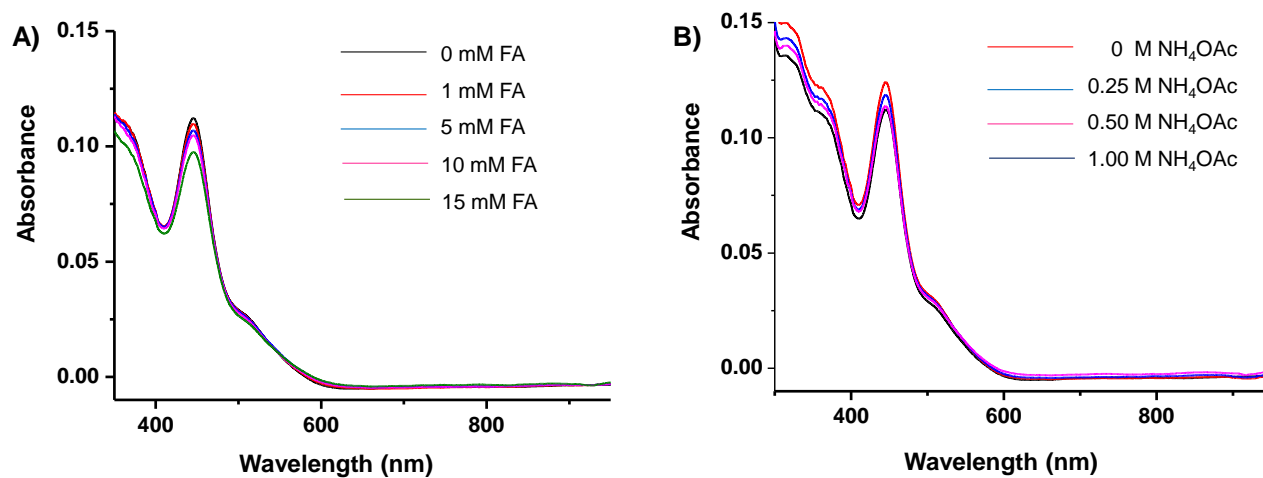

**Fig. S6** UV-vis spectra of  $[Ag_{29}(BDT)_{12}]^{3-}$  cluster in presence of different concentration of A) formic acid (FA) and B)  $NH_4OAc$ .

## Supplementary Information 7

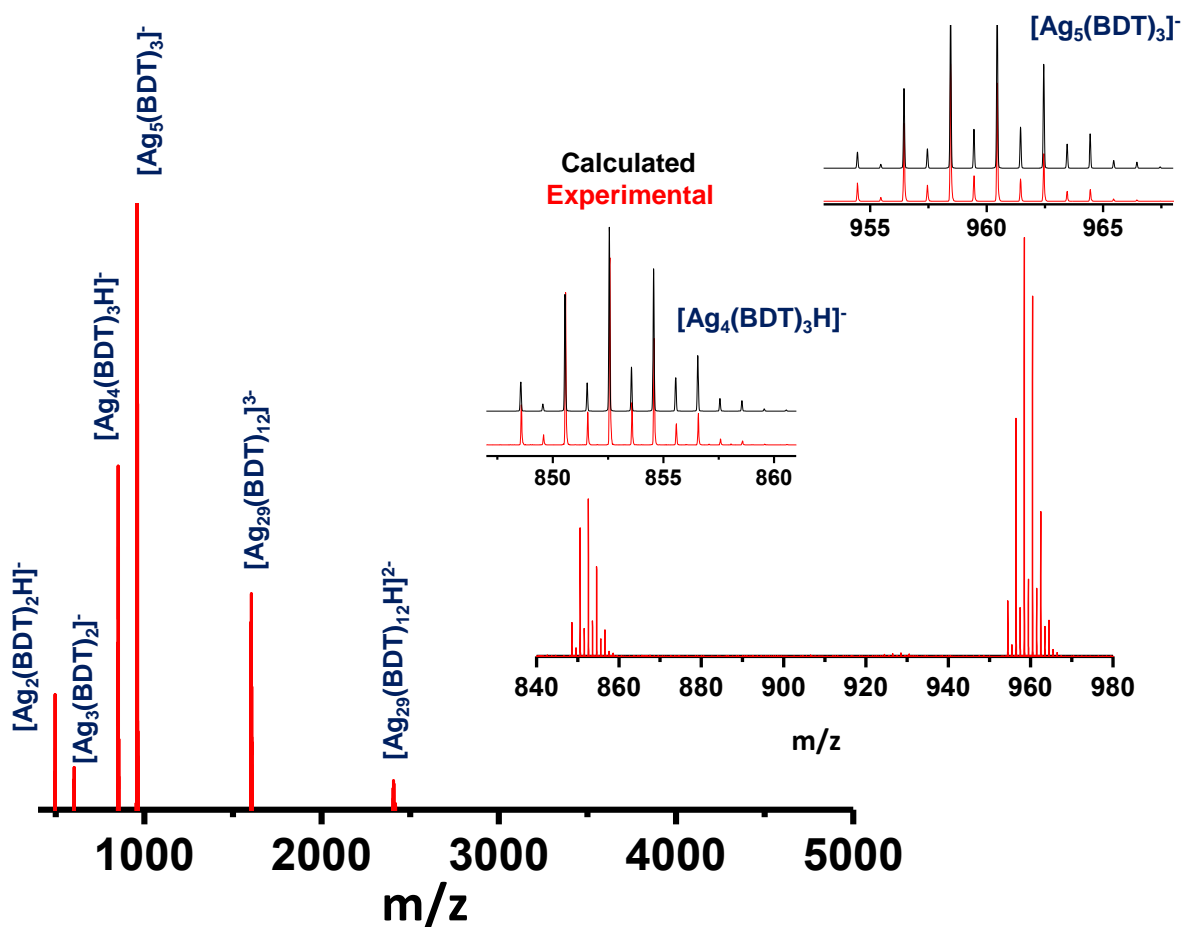

**Fig. S7** MS/MS of  $[\text{Ag}_{29}(\text{BDT})_{12}\text{H}]^{2-}$ . Inset shows the expanded view of the region from  $m/z$  840 to 980 showing the fragments  $[\text{Ag}_4(\text{BDT})_3\text{H}]^-$  and  $[\text{Ag}_5(\text{BDT})_3]^-$ . The theoretical and experimental isotope patterns of the fragments are also shown.



## Supplementary Information 8

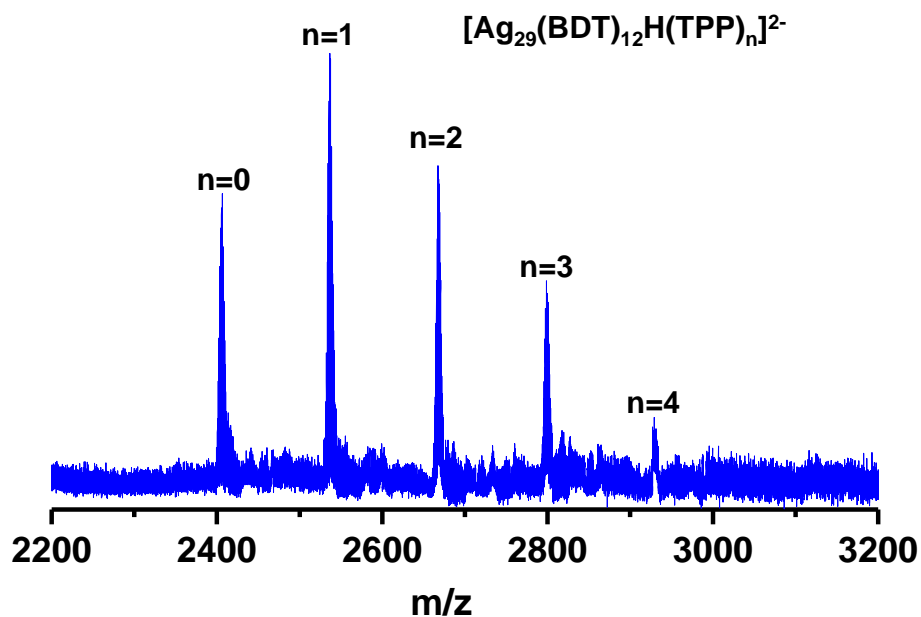

**Fig. S8** ESI MS under soft ionization conditions showing the formation of intact  $[\text{Ag}_{29}(\text{BDT})_{12}\text{H}(\text{TPP})_n]^{2-}$  ( $n=1-4$ ) clusters.

## Supplementary Information 9

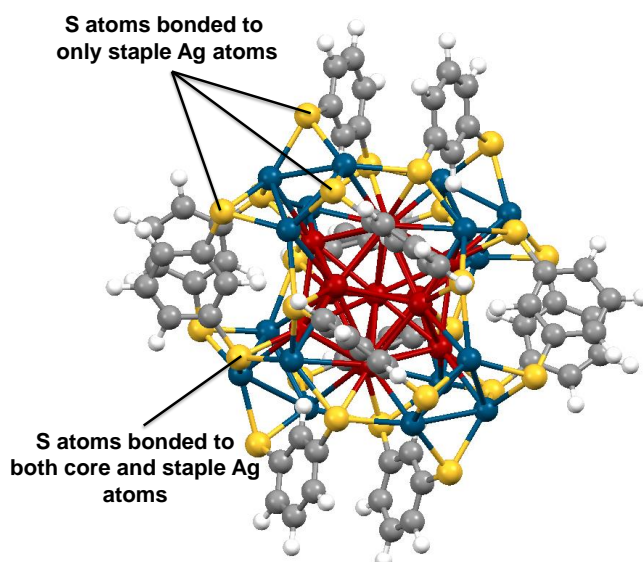

**Fig. S9** Structure of  $[\text{Ag}_{29}(\text{BDT})_{12}]^{3-}$  cluster showing two different types of S atoms in the exterior shell. Color codes: red: Ag atoms of the core; blue: Ag atoms of the staples; yellow: S; grey: C and white: H.

## Supplementary Information 10

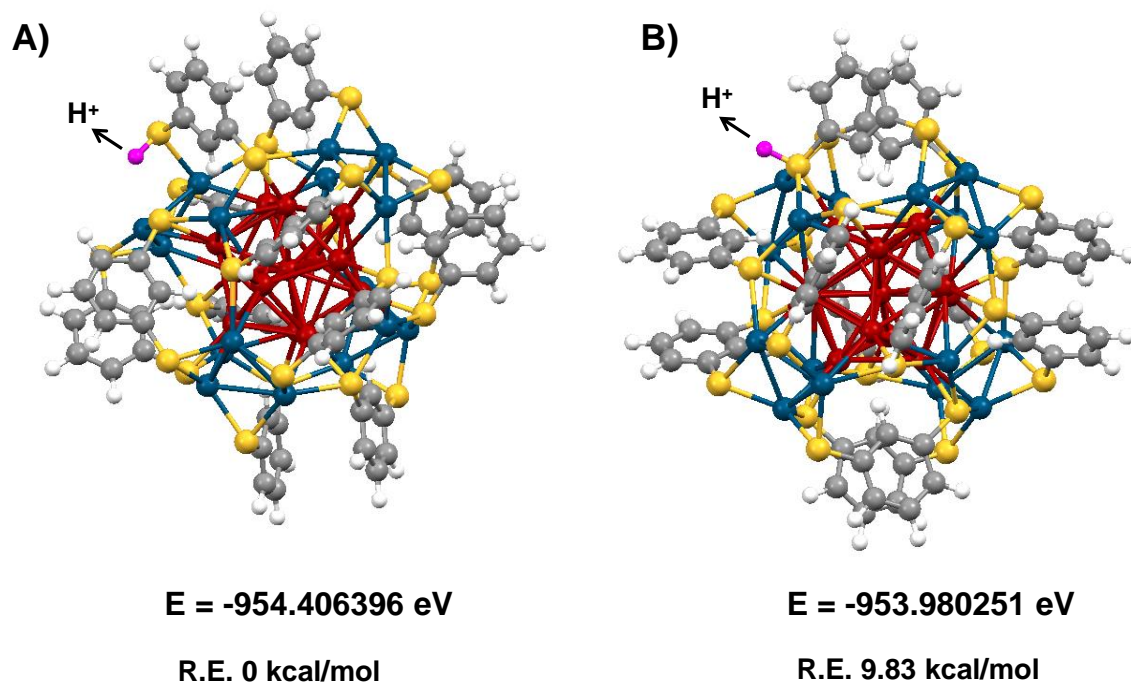

**Fig. S10** Structure of  $[\text{Ag}_{29}(\text{BDT})_{12}\text{H}]^{2-}$  with proton attached to S atom A) bonded to only Ag atoms of the staples and B) bonded to both staple and core Ag atoms. Color codes: red: Ag atoms of the core; blue: Ag atoms of the staples; yellow: S; grey: C, white: H and purple: proton.

## Supplementary Information 11

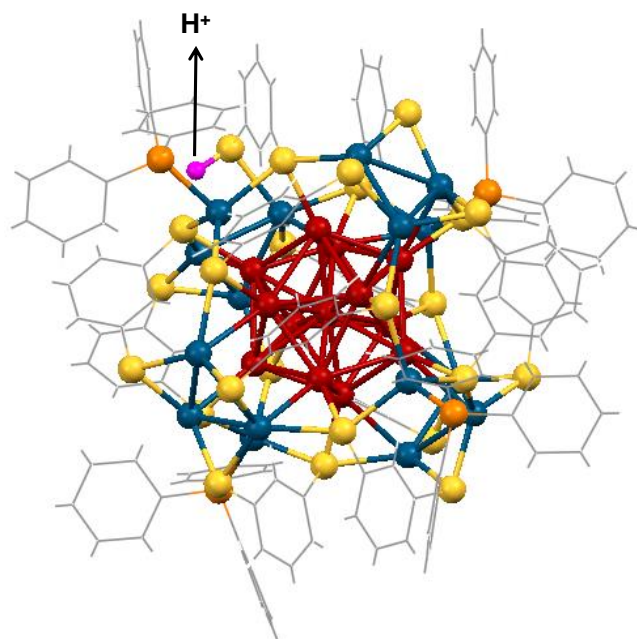

**Fig. S11** Structure of  $[\text{Ag}_{29}(\text{BDT})_{12}\text{H}(\text{TPP})_4]^{2-}$ . S-H bond distance is 1.38 Å and binding energy of proton is -73.92 kcal/mol. The P atoms are shown in orange color and thickness of the bonds in the ligands has been reduced for better clarity, proton is shown in purple color.

## Supplementary Information 12

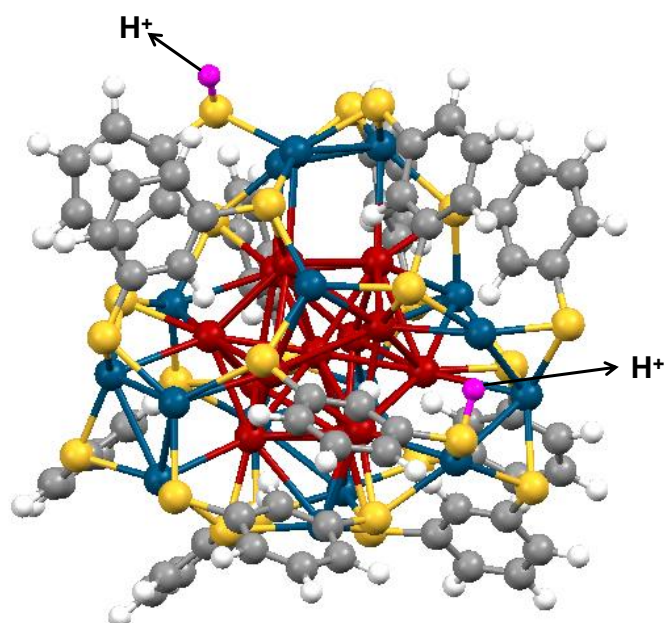

**Fig. S12** DFT optimized structure of  $[\text{Ag}_{29}(\text{BDT})_{12}\text{H}_2]$ . Proton is shown in purple color.

## Supplementary Information 13

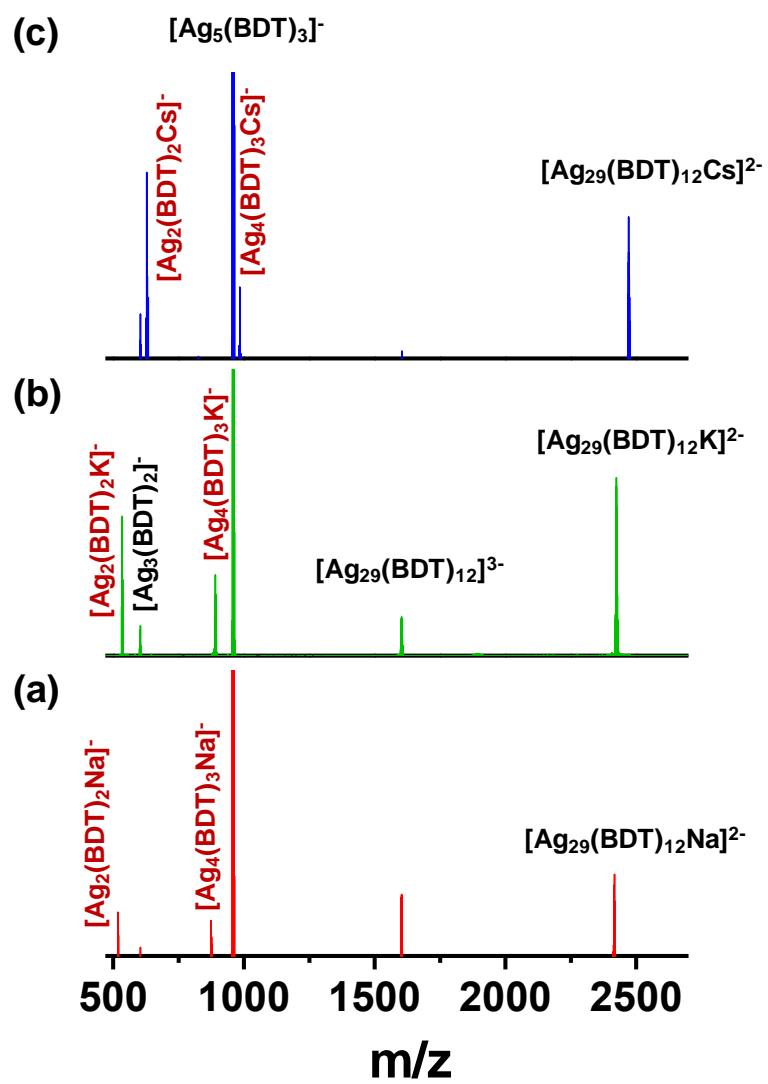

**Fig. S13** MS/MS of (a)  $[Ag_{29}(BDT)_{12}Na]^{2-}$ , (b)  $[Ag_{29}(BDT)_{12}K]^{2-}$  and (c)  $[Ag_{29}(BDT)_{12}Cs]^{2-}$ .

## Supplementary Information 14

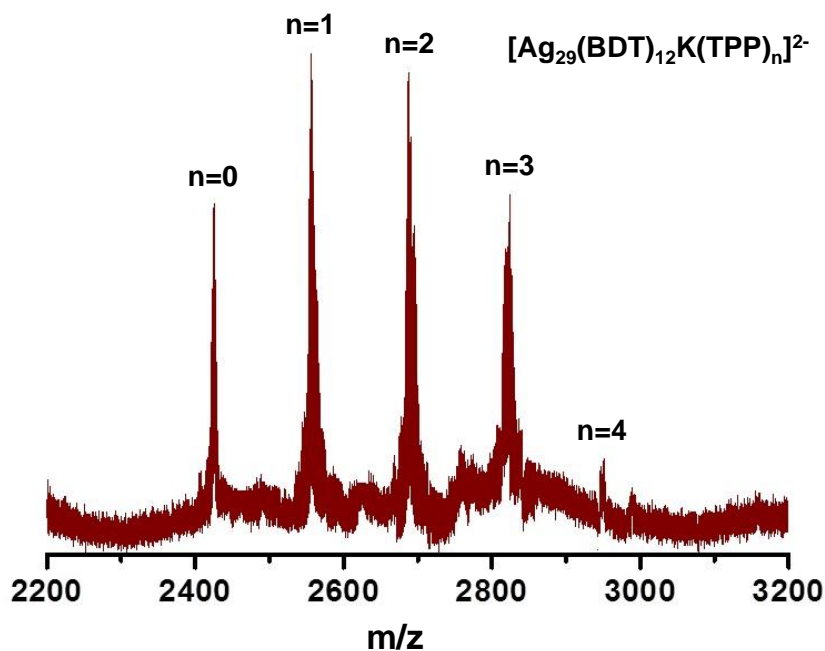

**Fig. S14.** ESI MS under soft ionization conditions showing the formation of intact  $[\text{Ag}_{29}(\text{BDT})_{12}\text{K}(\text{TPP})_n]^{2-}$  ( $n=1-4$ ) clusters.

## Supplementary Information 15

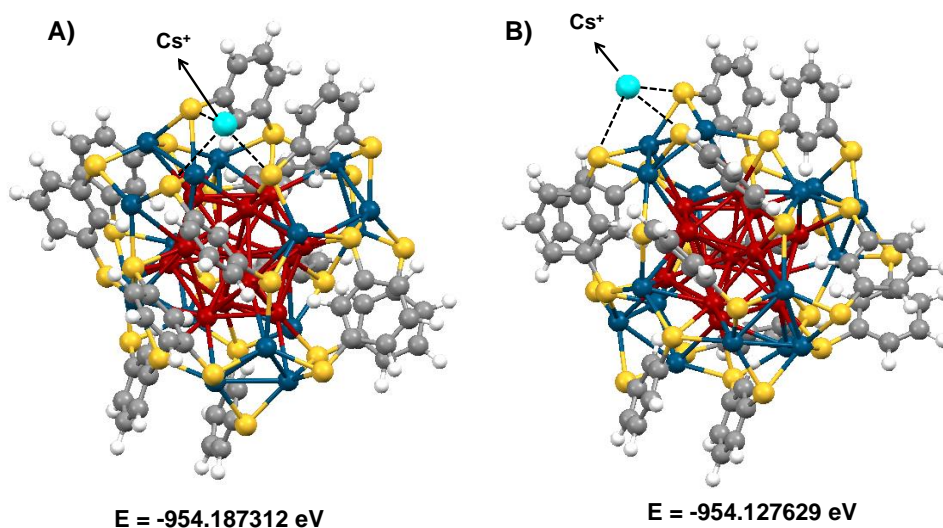

**Fig. S15** DFT optimized structure of  $[\text{Ag}_{29}(\text{BDT})_{12}\text{Cs}]^{2-}$  with A)  $\text{Cs}^+$  attached to S atoms one of which is attached to a core Ag atom and B) all S atoms are attached only to staple Ag atoms. Relative energies of A) 0 kcal/mol and B) 1.38 kcal/mol.

## Supplementary Information 16

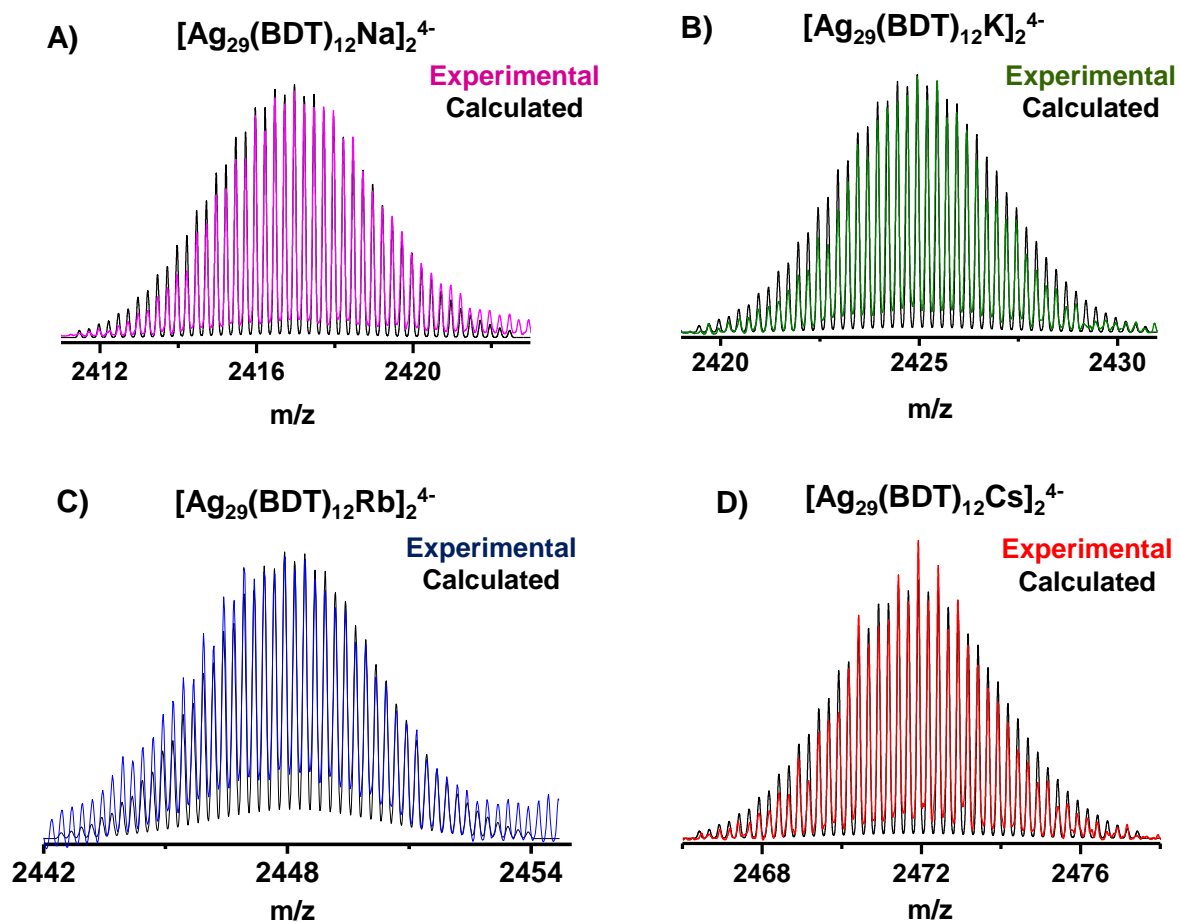

**Fig. S16** Experimental and calculated isotope patterns of the dimers A)  $[\text{Ag}_{29}(\text{BDT})_{12}\text{Na}]_2^{4-}$ , B)  $[\text{Ag}_{29}(\text{BDT})_{12}\text{K}]_2^{4-}$ , C)  $[\text{Ag}_{29}(\text{BDT})_{12}\text{Rb}]_2^{4-}$  and D)  $[\text{Ag}_{29}(\text{BDT})_{12}\text{Cs}]_2^{4-}$ .

## Supplementary Information 17

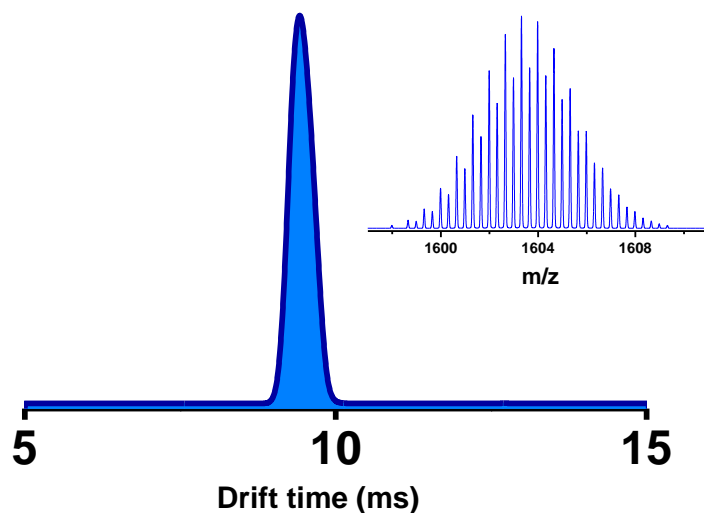

**Fig. S17** Drift time profile of  $[\text{Ag}_{29}(\text{BDT})_{12}]^{3-}$  showing only a single peak for the monomer. Inset shows the ESI MS corresponding to the mobilogram.

## Supplementary Information 18

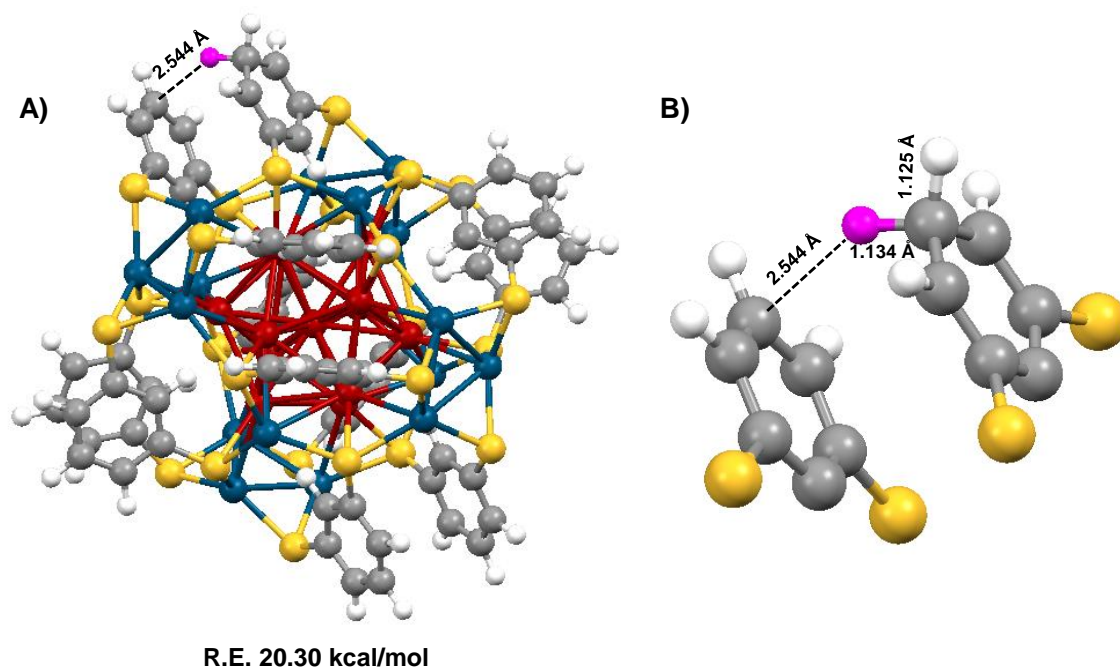

**Fig. S18** A) DFT optimized structure of  $[\text{Ag}_{29}(\text{BDT})_{12}\text{H}]^{2-}$  with proton sandwiched between the two benzene rings of the BDT ligands. B) Expanded view showing the conformation of the proton sandwiched between the two benzene rings. Proton is colored in purple.

## Supplementary Information 19

| Species (Monomers)                                | CCS values ( $\text{\AA}^2$ ) |
|---------------------------------------------------|-------------------------------|
| $[\text{Ag}_{29}(\text{BDT})_{12}\text{H}]^{2-}$  | 535.57                        |
| $[\text{Ag}_{29}(\text{BDT})_{12}\text{Li}]^{2-}$ | 535.92                        |
| $[\text{Ag}_{29}(\text{BDT})_{12}\text{Na}]^{2-}$ | 537.52                        |
| $[\text{Ag}_{29}(\text{BDT})_{12}\text{K}]^{2-}$  | 539.78                        |
| $[\text{Ag}_{29}(\text{BDT})_{12}\text{Rb}]^{2-}$ | 543.67                        |
| $[\text{Ag}_{29}(\text{BDT})_{12}\text{Cs}]^{2-}$ | 547.92                        |

  

| Species (Dimers)                                    | CCS values ( $\text{\AA}^2$ ) |
|-----------------------------------------------------|-------------------------------|
| $[\text{Ag}_{29}(\text{BDT})_{12}\text{Na}]_2^{4-}$ | 877.31                        |
| $[\text{Ag}_{29}(\text{BDT})_{12}\text{K}]_2^{4-}$  | 880.51                        |
| $[\text{Ag}_{29}(\text{BDT})_{12}\text{Rb}]_2^{4-}$ | 887.30                        |
| $[\text{Ag}_{29}(\text{BDT})_{12}\text{Cs}]_2^{4-}$ | 894.72                        |

**Fig. S19** CCS values of the monomers  $[\text{Ag}_{29}(\text{BDT})_{12}\text{M}]^{2-}$  (M=H, Li, Na, K, Rb, Cs) and the dimers  $[\text{Ag}_{29}(\text{BDT})_{12}\text{M}]_2^{4-}$  (M=Na, K, Rb, Cs) measured from IM MS.



## Supplementary Information 20

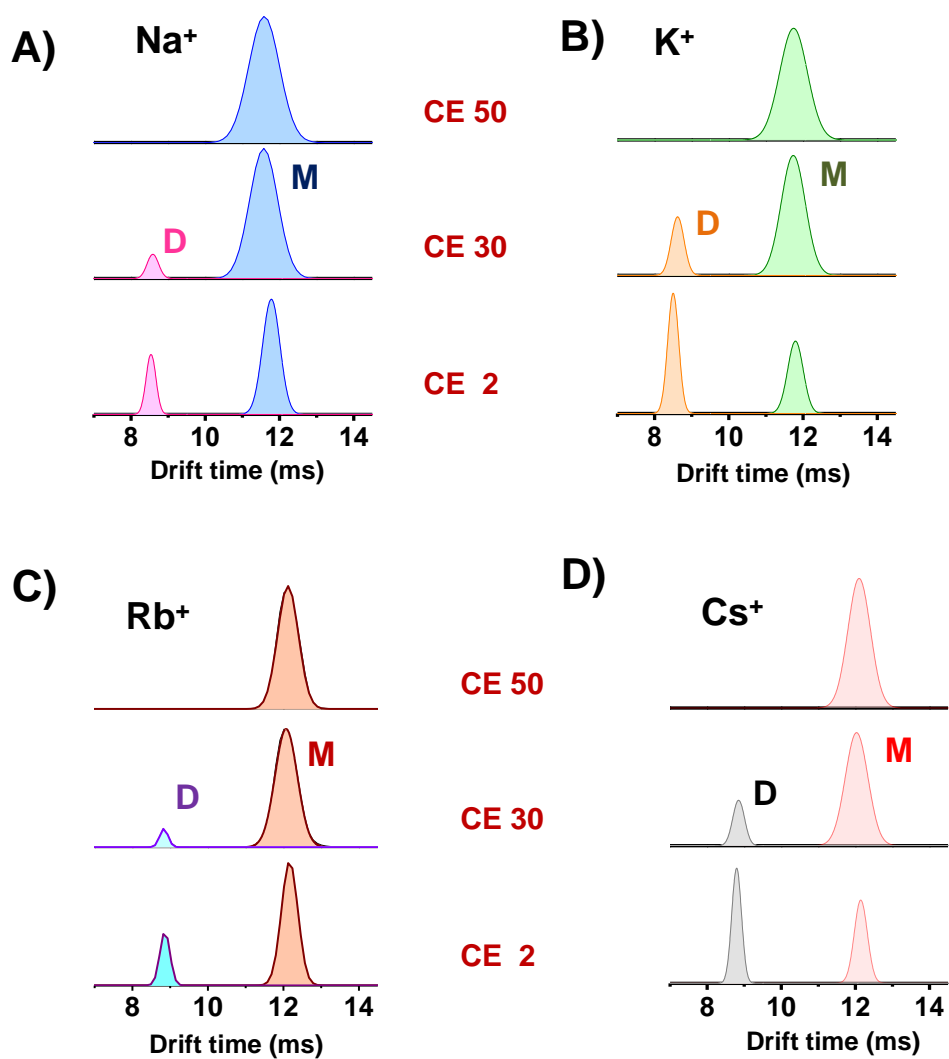

**Fig. S20** CID of the dimers  $[Ag_{29}(BDT)_{12}M]_2^{4+}$ , A) M=Na, B) M=K, C) M=Rb and D) M=Cs.

## Supplementary Information 21

### Cartesian coordinates of the DFT optimized lowest energy structures

#### 1. Lowest energy structure of $[\text{Ag}_{29}(\text{BDT})_{12}\text{H}]^{2-}$

|    |          |          |          |
|----|----------|----------|----------|
| Ag | 12.12766 | 11.84008 | 12.01999 |
| Ag | 14.14016 | 13.63322 | 10.95673 |
| Ag | 12.34732 | 14.27013 | 13.43560 |
| Ag | 11.08233 | 14.08635 | 10.69810 |
| Ag | 10.29240 | 9.92083  | 13.11112 |
| Ag | 17.18262 | 14.32407 | 10.82974 |
| Ag | 12.93858 | 16.30210 | 11.36363 |
| Ag | 11.06812 | 15.86380 | 15.53885 |
| Ag | 9.23988  | 15.12299 | 8.71579  |
| Ag | 8.46109  | 14.53151 | 15.48484 |
| Ag | 7.63643  | 11.04486 | 12.40879 |
| S  | 16.08939 | 12.30479 | 15.49843 |
| S  | 12.86353 | 16.76545 | 13.83854 |
| S  | 10.78274 | 16.58668 | 9.95942  |
| S  | 8.02919  | 9.03544  | 13.88296 |
| S  | 18.15181 | 15.16647 | 12.97794 |
| S  | 12.14824 | 15.40121 | 17.87582 |
| S  | 8.85050  | 16.97962 | 15.22178 |
| S  | 8.08747  | 13.24027 | 17.61022 |
| C  | 15.59368 | 13.69200 | 16.50911 |
| C  | 16.59040 | 14.38601 | 17.23824 |
| H  | 17.65286 | 14.11403 | 17.09193 |
| C  | 16.23151 | 15.40103 | 18.14352 |
| H  | 17.02116 | 15.93002 | 18.71159 |
| C  | 14.88287 | 15.73914 | 18.35886 |
| H  | 14.60110 | 16.50926 | 19.10220 |
| C  | 13.89528 | 15.07864 | 17.59741 |
| C  | 14.24078 | 14.07569 | 16.67305 |
| H  | 13.45302 | 13.58586 | 16.06329 |
| C  | 14.60781 | 16.82307 | 14.25914 |
| C  | 15.05527 | 17.83715 | 15.13709 |
| H  | 14.32178 | 18.50916 | 15.62184 |
| C  | 16.43800 | 17.99457 | 15.35534 |
| H  | 16.79341 | 18.79078 | 16.03909 |
| C  | 17.37381 | 17.17243 | 14.70391 |
| H  | 18.45943 | 17.32342 | 14.85896 |
| C  | 16.93277 | 16.14298 | 13.83048 |

|    |          |          |          |
|----|----------|----------|----------|
| C  | 15.54432 | 15.97269 | 13.63630 |
| H  | 15.19288 | 15.16526 | 12.96043 |
| C  | 9.60929  | 17.24053 | 11.16748 |
| C  | 9.61463  | 16.79520 | 12.50615 |
| H  | 10.27577 | 15.95500 | 12.80378 |
| C  | 8.80624  | 17.41264 | 13.48813 |
| C  | 7.95702  | 18.47721 | 13.09175 |
| H  | 7.32747  | 18.97959 | 13.85091 |
| C  | 7.92363  | 18.89241 | 11.74888 |
| H  | 7.24797  | 19.71813 | 11.45076 |
| C  | 8.74629  | 18.28882 | 10.77824 |
| H  | 8.73373  | 18.63482 | 9.72757  |
| C  | 7.65321  | 9.69823  | 15.50851 |
| C  | 8.05005  | 10.99559 | 15.89582 |
| H  | 8.72055  | 11.57489 | 15.22790 |
| C  | 7.60650  | 11.57920 | 17.10436 |
| C  | 6.75990  | 10.82524 | 17.95246 |
| H  | 6.40093  | 11.26733 | 18.90178 |
| C  | 6.38983  | 9.51734  | 17.58495 |
| H  | 5.73328  | 8.93146  | 18.25821 |
| C  | 6.82904  | 8.94286  | 16.37730 |
| H  | 6.52651  | 7.91752  | 16.09219 |
| Ag | 14.57966 | 10.82296 | 11.01006 |
| Ag | 12.35392 | 12.03352 | 9.21788  |
| Ag | 11.78429 | 9.34962  | 10.72547 |
| Ag | 9.76635  | 13.01636 | 13.14855 |
| Ag | 17.56469 | 11.34773 | 10.57893 |
| Ag | 13.73919 | 9.55782  | 8.43322  |
| Ag | 10.88793 | 12.88166 | 6.76239  |
| Ag | 11.49647 | 6.34311  | 11.05050 |
| Ag | 8.09106  | 12.50804 | 7.97804  |
| S  | 15.04959 | 15.86772 | 10.07581 |
| S  | 13.17304 | 11.53739 | 6.87287  |
| S  | 12.01254 | 7.74500  | 8.78677  |
| S  | 7.22775  | 13.27529 | 13.55354 |
| S  | 18.14799 | 13.12352 | 8.87991  |
| S  | 11.39748 | 15.27926 | 5.85530  |
| S  | 8.99678  | 11.49258 | 5.90386  |
| S  | 6.89583  | 14.73342 | 8.16886  |
| C  | 14.57902 | 16.02442 | 8.36027  |
| C  | 15.45195 | 16.73082 | 7.49463  |
| H  | 16.42739 | 17.08079 | 7.88379  |
| C  | 15.07452 | 16.99663 | 6.16792  |
| H  | 15.76233 | 17.55691 | 5.50612  |

|    |          |          |          |
|----|----------|----------|----------|
| C  | 13.82417 | 16.57575 | 5.67567  |
| H  | 13.50721 | 16.81392 | 4.64354  |
| C  | 12.97052 | 15.84497 | 6.52873  |
| C  | 13.34886 | 15.54751 | 7.85119  |
| H  | 12.67711 | 14.94316 | 8.49571  |
| C  | 14.73133 | 12.40773 | 6.69305  |
| C  | 15.09855 | 12.87808 | 5.41045  |
| H  | 14.39502 | 12.77364 | 4.56244  |
| C  | 16.37333 | 13.44858 | 5.22782  |
| H  | 16.66655 | 13.81401 | 4.22390  |
| C  | 17.28707 | 13.54368 | 6.29228  |
| H  | 18.29365 | 13.97690 | 6.13577  |
| C  | 16.92864 | 13.07249 | 7.58250  |
| C  | 15.63995 | 12.52403 | 7.76474  |
| H  | 15.35489 | 12.14634 | 8.76789  |
| C  | 10.66735 | 8.15279  | 7.67189  |
| C  | 10.33329 | 9.48971  | 7.36901  |
| H  | 10.83763 | 10.31385 | 7.91409  |
| C  | 9.38332  | 9.80701  | 6.37432  |
| C  | 8.73953  | 8.74595  | 5.68867  |
| H  | 7.99050  | 8.97370  | 4.90623  |
| C  | 9.04627  | 7.41208  | 6.01529  |
| H  | 8.52816  | 6.58827  | 5.48531  |
| C  | 10.00392 | 7.10134  | 6.99885  |
| H  | 10.24810 | 6.05179  | 7.24776  |
| C  | 6.60158  | 14.35376 | 12.27004 |
| C  | 6.99367  | 14.18743 | 10.92670 |
| H  | 7.78341  | 13.44908 | 10.68059 |
| C  | 6.39916  | 14.93337 | 9.88537  |
| C  | 5.37908  | 15.86087 | 10.20973 |
| H  | 4.89588  | 16.44781 | 9.40566  |
| C  | 4.99605  | 16.03745 | 11.55319 |
| H  | 4.19917  | 16.76670 | 11.80071 |
| C  | 5.60119  | 15.30236 | 12.59019 |
| H  | 5.29047  | 15.44558 | 13.64270 |
| Ag | 14.56979 | 12.31734 | 13.43863 |
| Ag | 13.11700 | 9.47201  | 13.24184 |
| Ag | 11.82524 | 11.81259 | 14.79417 |
| Ag | 9.78658  | 11.54266 | 10.40601 |
| Ag | 17.62538 | 12.73191 | 13.28901 |
| Ag | 14.29516 | 10.53575 | 15.79093 |
| Ag | 12.60453 | 6.52623  | 13.87518 |
| Ag | 10.43216 | 12.80926 | 17.13157 |
| Ag | 9.67755  | 6.90629  | 13.40637 |

|   |          |          |          |
|---|----------|----------|----------|
| S | 16.04943 | 9.45337  | 9.47365  |
| S | 14.47761 | 8.17858  | 14.95007 |
| S | 12.30053 | 11.21372 | 17.29607 |
| S | 7.38451  | 10.85042 | 9.90927  |
| S | 18.89358 | 10.69739 | 12.59865 |
| S | 13.48891 | 5.15473  | 11.98646 |
| S | 10.75661 | 6.13345  | 15.52712 |
| S | 9.09064  | 5.70884  | 11.29863 |
| C | 16.09814 | 7.84543  | 10.27090 |
| C | 17.30764 | 7.11391  | 10.24960 |
| H | 18.22149 | 7.56964  | 9.82335  |
| C | 17.32703 | 5.80790  | 10.77653 |
| H | 18.27352 | 5.23247  | 10.76304 |
| C | 16.16864 | 5.22016  | 11.31443 |
| H | 16.19369 | 4.19029  | 11.71931 |
| C | 14.95243 | 5.95078  | 11.34997 |
| C | 14.94166 | 7.26386  | 10.83083 |
| H | 13.99323 | 7.83943  | 10.85647 |
| C | 16.15266 | 8.13582  | 14.30568 |
| C | 16.93547 | 6.98566  | 14.55504 |
| H | 16.47874 | 6.10569  | 15.04547 |
| C | 18.29481 | 6.98979  | 14.18767 |
| H | 18.91359 | 6.09185  | 14.38543 |
| C | 18.88372 | 8.11666  | 13.58741 |
| H | 19.95706 | 8.11591  | 13.31825 |
| C | 18.10124 | 9.26924  | 13.31756 |
| C | 16.73459 | 9.25170  | 13.67044 |
| H | 16.11713 | 10.14843 | 13.45400 |
| C | 11.32663 | 9.70691  | 17.49570 |
| C | 11.35053 | 8.69952  | 16.51074 |
| H | 11.90863 | 8.86542  | 15.56740 |
| C | 10.67758 | 7.47036  | 16.70072 |
| C | 9.95172  | 7.28277  | 17.90651 |
| H | 9.41343  | 6.32908  | 18.06885 |
| C | 9.91206  | 8.29810  | 18.87898 |
| H | 9.33453  | 8.13899  | 19.81164 |
| C | 10.59906 | 9.51287  | 18.69179 |
| H | 10.57252 | 10.30543 | 19.46323 |
| C | 7.41812  | 9.07941  | 9.61850  |
| C | 8.23874  | 8.22607  | 10.38330 |
| H | 8.96486  | 8.66164  | 11.10065 |
| C | 8.13085  | 6.82102  | 10.28752 |
| C | 7.18732  | 6.27594  | 9.37829  |
| H | 7.08354  | 5.17650  | 9.29813  |

|   |          |          |          |
|---|----------|----------|----------|
| C | 6.39246  | 7.12809  | 8.59074  |
| H | 5.66289  | 6.69089  | 7.88024  |
| C | 6.49560  | 8.52847  | 8.69983  |
| H | 5.85629  | 9.19818  | 8.09399  |
| H | 10.57455 | 15.96614 | 6.73137  |
| H | 12.27233 | 16.73926 | 18.16195 |

## 2. Lowest energy structure of $[\text{Ag}_{29}(\text{BDT})_{12}\text{Na}]^{2-}$

|    |          |          |          |
|----|----------|----------|----------|
| Ag | 11.95973 | 12.00974 | 11.99381 |
| Ag | 14.42864 | 12.16314 | 13.48003 |
| Ag | 13.40786 | 14.49236 | 12.14506 |
| Ag | 12.09081 | 13.43340 | 14.44515 |
| Ag | 11.94554 | 10.45090 | 14.36655 |
| Ag | 14.33432 | 12.18867 | 10.56967 |
| Ag | 10.41898 | 14.38335 | 11.91192 |
| Ag | 13.55040 | 9.62893  | 11.78774 |
| Ag | 11.77999 | 13.55548 | 9.57835  |
| Ag | 9.57844  | 11.78097 | 13.48966 |
| Ag | 9.52745  | 12.06769 | 10.49916 |
| Ag | 10.57998 | 9.52315  | 12.05734 |
| Ag | 12.10206 | 10.58496 | 9.50575  |
| Ag | 16.19958 | 13.77189 | 15.35536 |
| Ag | 15.37121 | 16.20265 | 13.78583 |
| Ag | 13.74582 | 15.34684 | 16.16968 |
| Ag | 14.69966 | 9.38179  | 14.54317 |
| Ag | 14.49618 | 14.81571 | 9.29519  |
| Ag | 9.34341  | 14.52767 | 14.68794 |
| Ag | 10.32328 | 8.49118  | 16.10779 |
| Ag | 14.94163 | 9.90605  | 9.16855  |
| Ag | 8.48787  | 16.10670 | 10.28548 |
| Ag | 15.32934 | 7.35410  | 10.26613 |
| Ag | 10.07172 | 15.38439 | 7.82215  |
| Ag | 7.85206  | 10.07064 | 15.37251 |
| Ag | 8.65487  | 7.70567  | 13.72820 |
| Ag | 13.49063 | 8.30243  | 7.38777  |
| Ag | 7.72666  | 13.71498 | 8.60723  |
| Ag | 9.35375  | 9.33302  | 9.35394  |
| S  | 11.16450 | 14.67550 | 16.45022 |
| S  | 16.48411 | 11.17366 | 14.63075 |
| S  | 14.66867 | 16.47795 | 11.17308 |
| S  | 12.91604 | 9.14432  | 16.32099 |

|   |          |          |          |
|---|----------|----------|----------|
| S | 16.33432 | 13.02676 | 9.15979  |
| S | 9.10514  | 16.30832 | 12.89774 |
| S | 14.84744 | 7.58400  | 12.72365 |
| S | 12.68791 | 14.81746 | 7.54709  |
| S | 7.62468  | 12.66614 | 14.83224 |
| S | 7.56275  | 11.10249 | 9.19972  |
| S | 9.33784  | 7.52864  | 11.12029 |
| S | 11.12656 | 9.25240  | 7.53515  |
| S | 15.27676 | 14.03587 | 17.66339 |
| S | 17.70020 | 15.30960 | 14.05962 |
| S | 13.99251 | 17.67662 | 15.25721 |
| S | 8.82408  | 9.73855  | 17.67363 |
| S | 17.39804 | 8.85359  | 9.62873  |
| S | 9.74752  | 17.67823 | 8.79027  |
| S | 10.02551 | 6.17767  | 15.15436 |
| S | 15.18557 | 9.94835  | 6.42402  |
| S | 6.19649  | 15.10918 | 10.00273 |
| S | 6.32971  | 8.57785  | 14.04986 |
| S | 14.11212 | 6.15124  | 8.47441  |
| S | 8.60221  | 14.06242 | 6.27771  |
| C | 10.70824 | 13.40569 | 17.63373 |
| C | 17.60416 | 10.70399 | 13.31021 |
| C | 13.39936 | 17.65815 | 10.70702 |
| C | 10.81362 | 13.69938 | 19.01343 |
| C | 18.99939 | 10.79356 | 13.52646 |
| C | 13.68541 | 19.03831 | 10.81636 |
| H | 11.26396 | 14.65561 | 19.34043 |
| H | 19.38524 | 11.24525 | 14.45983 |
| H | 14.63608 | 19.36803 | 11.27652 |
| C | 10.33017 | 12.76632 | 19.95105 |
| C | 19.88059 | 10.29268 | 12.54917 |
| C | 12.75106 | 19.97076 | 10.32479 |
| H | 10.41350 | 12.99205 | 21.03308 |
| H | 20.97386 | 10.35553 | 12.72295 |
| H | 12.96784 | 21.05451 | 10.40952 |
| C | 9.74015  | 11.55808 | 19.53944 |
| C | 19.40261 | 9.70217  | 11.36442 |
| C | 11.55281 | 19.55257 | 9.71970  |
| H | 9.34821  | 10.83887 | 20.28416 |
| H | 20.10714 | 9.28891  | 10.61693 |
| H | 10.83119 | 20.29310 | 9.32440  |
| C | 9.63992  | 11.24797 | 18.15751 |
| C | 18.00539 | 9.62711  | 11.12552 |
| C | 11.25032 | 18.16917 | 9.61672  |

|   |          |          |          |
|---|----------|----------|----------|
| C | 10.14598 | 12.17840 | 17.22375 |
| C | 17.13121 | 10.14569 | 12.10392 |
| C | 12.17959 | 17.24106 | 10.13359 |
| H | 10.07230 | 11.94360 | 16.14168 |
| H | 16.03799 | 10.09482 | 11.92406 |
| H | 11.95012 | 16.15718 | 10.06355 |
| C | 13.35315 | 10.39349 | 17.53094 |
| C | 17.56391 | 13.48371 | 10.37672 |
| C | 10.35272 | 17.52332 | 13.32867 |
| C | 13.19312 | 10.09202 | 18.90312 |
| C | 18.93789 | 13.31505 | 10.08249 |
| C | 10.05456 | 18.89416 | 13.15228 |
| H | 12.71184 | 9.14295  | 19.20591 |
| H | 19.25205 | 12.88251 | 9.11173  |
| H | 9.10949  | 19.19292 | 12.66106 |
| C | 13.66156 | 11.00741 | 19.86446 |
| C | 19.90432 | 13.72384 | 11.02055 |
| C | 10.97074 | 19.85988 | 13.61267 |
| H | 13.54092 | 10.77135 | 20.94054 |
| H | 20.97872 | 13.57863 | 10.78999 |
| H | 10.73912 | 20.93526 | 13.47599 |
| C | 14.28793 | 12.20753 | 19.48323 |
| C | 19.52432 | 14.31335 | 12.23818 |
| C | 12.16890 | 19.48461 | 14.24469 |
| H | 14.66819 | 12.91382 | 20.24584 |
| H | 20.29004 | 14.64581 | 12.96509 |
| H | 12.87346 | 20.25162 | 14.62021 |
| C | 14.43512 | 12.52856 | 18.10857 |
| C | 18.14912 | 14.49139 | 12.54563 |
| C | 12.48938 | 18.11093 | 14.40474 |
| C | 13.94877 | 11.61360 | 17.15019 |
| C | 17.18767 | 14.05439 | 11.60893 |
| C | 11.57231 | 17.14854 | 13.93024 |
| H | 14.05904 | 11.85847 | 16.07329 |
| H | 16.11111 | 14.17685 | 11.84740 |
| H | 11.81135 | 16.07273 | 14.05980 |
| C | 13.59261 | 6.36296  | 13.11132 |
| C | 13.13405 | 13.51925 | 6.39176  |
| C | 6.40684  | 13.07096 | 13.58044 |
| C | 12.42009 | 6.72548  | 13.80229 |
| C | 13.81585 | 12.35805 | 6.81199  |
| C | 6.76301  | 13.74751 | 12.39522 |
| H | 12.22345 | 7.79254  | 14.03114 |
| H | 13.99797 | 12.19744 | 7.89399  |



|   |          |          |          |
|---|----------|----------|----------|
| H | 7.83102  | 13.95961 | 12.18416 |
| C | 11.47965 | 5.75606  | 14.21788 |
| C | 14.27142 | 11.39191 | 5.88942  |
| C | 5.78906  | 14.18096 | 11.46980 |
| C | 11.73329 | 4.39458  | 13.90712 |
| C | 14.02008 | 11.59964 | 4.50964  |
| C | 4.42550  | 13.90186 | 11.74710 |
| H | 11.00416 | 3.62495  | 14.22671 |
| H | 14.36821 | 10.84988 | 3.77357  |
| H | 3.65018  | 14.23474 | 11.03069 |
| C | 12.88967 | 4.03581  | 13.19152 |
| C | 13.30997 | 12.74023 | 4.09186  |
| C | 4.07114  | 13.20084 | 12.91306 |
| H | 13.06780 | 2.97089  | 12.94052 |
| H | 13.08799 | 12.88288 | 3.01574  |
| H | 3.00504  | 12.97060 | 13.10959 |
| C | 13.82677 | 5.00611  | 12.78757 |
| C | 12.86438 | 13.70430 | 5.01648  |
| C | 5.04732  | 12.78160 | 13.83745 |
| H | 14.73630 | 4.72219  | 12.22463 |
| H | 12.30906 | 14.60097 | 4.68176  |
| H | 4.76476  | 12.23175 | 14.75477 |
| C | 6.37642  | 10.55085 | 10.42900 |
| C | 10.52655 | 6.32515  | 10.53015 |
| C | 10.58826 | 10.45658 | 6.32640  |
| C | 6.78264  | 9.98692  | 11.65708 |
| C | 11.74895 | 6.69146  | 9.92581  |
| C | 10.02134 | 11.68327 | 6.72826  |
| H | 7.85856  | 9.98054  | 11.93282 |
| H | 12.05675 | 7.75764  | 9.90527  |
| H | 10.01918 | 11.96623 | 7.80206  |
| C | 5.85159  | 9.39776  | 12.54064 |
| C | 12.58419 | 5.72360  | 9.32071  |
| C | 9.42319  | 12.55783 | 5.79376  |
| C | 4.47745  | 9.41412  | 12.18500 |
| C | 12.19224 | 4.36413  | 9.34743  |
| C | 9.43338  | 12.19007 | 4.42175  |
| H | 3.73741  | 8.95302  | 12.86696 |
| H | 12.84130 | 3.60710  | 8.86630  |
| H | 8.95834  | 12.86027 | 3.67938  |
| C | 4.06799  | 10.00989 | 10.97959 |
| C | 10.98999 | 3.99482  | 9.97807  |
| C | 10.03523 | 10.98462 | 4.01734  |
| H | 2.99119  | 10.02579 | 10.71676 |

|    |          |          |          |
|----|----------|----------|----------|
| H  | 10.68985 | 2.92839  | 10.00078 |
| H  | 10.04007 | 10.70936 | 2.94336  |
| C  | 5.00269  | 10.57665 | 10.09179 |
| C  | 10.15471 | 4.95945  | 10.56874 |
| C  | 10.61246 | 10.10835 | 4.95625  |
| H  | 4.67874  | 11.02790 | 9.13474  |
| H  | 9.20208  | 4.66744  | 11.04919 |
| H  | 11.06424 | 9.14840  | 4.64323  |
| Na | 17.40195 | 10.90581 | 7.78562  |

### 3. Lowest energy structure of $[\text{Ag}_{29}(\text{BDT})_{12}\text{Na}]_2^{4-}$

|    |          |          |          |
|----|----------|----------|----------|
| Ag | 12.37740 | 11.69433 | 12.00183 |
| Ag | 13.09149 | 13.06790 | 14.42051 |
| Ag | 11.53374 | 14.41782 | 12.41534 |
| Ag | 10.40224 | 12.30024 | 13.97578 |
| Ag | 12.34086 | 10.04092 | 14.29241 |
| Ag | 14.35750 | 13.66263 | 11.85953 |
| Ag | 9.88713  | 12.46379 | 10.85814 |
| Ag | 15.01878 | 11.02061 | 12.90129 |
| Ag | 12.30643 | 13.24506 | 9.60731  |
| Ag | 10.40273 | 9.67892  | 12.22666 |
| Ag | 11.51317 | 10.50176 | 9.56700  |
| Ag | 13.13167 | 8.94680  | 11.78442 |
| Ag | 14.52717 | 11.29915 | 10.12577 |
| Ag | 12.26712 | 14.99767 | 16.62078 |
| Ag | 10.82666 | 16.55726 | 14.45720 |
| Ag | 9.38106  | 14.40261 | 15.97002 |
| Ag | 14.67471 | 10.97350 | 15.86698 |
| Ag | 13.30199 | 15.98868 | 10.47896 |
| Ag | 7.91855  | 11.27272 | 12.73833 |
| Ag | 11.84838 | 7.21985  | 15.36786 |
| Ag | 16.91182 | 12.75226 | 11.29963 |
| Ag | 8.30205  | 12.83292 | 8.28742  |
| Ag | 18.48773 | 10.88218 | 12.80063 |
| Ag | 10.83818 | 13.87899 | 7.00315  |
| Ag | 9.64728  | 6.89911  | 13.33812 |
| Ag | 12.39797 | 6.02333  | 12.63187 |
| Ag | 17.74090 | 10.95525 | 9.28824  |
| Ag | 10.14958 | 10.96003 | 6.82860  |
| Ag | 13.71213 | 8.62526  | 8.90180  |
| S  | 8.10963  | 12.19000 | 15.09673 |
| S  | 14.46873 | 13.41894 | 16.53441 |
| S  | 11.38345 | 16.90917 | 11.85213 |

|   |          |          |          |
|---|----------|----------|----------|
| S | 12.92725 | 9.28248  | 16.64680 |
| S | 15.67710 | 15.85016 | 11.48309 |
| S | 7.35730  | 12.82092 | 10.80429 |
| S | 16.72168 | 10.09668 | 14.55640 |
| S | 12.90730 | 15.19916 | 8.09438  |
| S | 8.02511  | 8.77476  | 12.34006 |
| S | 11.51281 | 8.81672  | 7.65645  |
| S | 13.97725 | 6.81907  | 10.64514 |
| S | 15.60005 | 10.09999 | 8.13240  |
| S | 10.50904 | 14.09873 | 18.18729 |
| S | 12.67388 | 17.37292 | 15.94728 |
| S | 8.36487  | 16.46284 | 14.93215 |
| S | 9.42015  | 6.78584  | 15.84298 |
| S | 18.79514 | 13.49845 | 13.00439 |
| S | 8.65507  | 15.11024 | 7.30455  |
| S | 13.56686 | 5.48007  | 14.76088 |
| S | 18.13240 | 13.42029 | 8.97476  |
| S | 7.66668  | 10.70472 | 7.09697  |
| S | 10.25072 | 5.11487  | 11.68481 |
| S | 18.92691 | 9.34769  | 10.76394 |
| S | 11.43821 | 12.31078 | 5.14117  |
| C | 8.15814  | 10.70698 | 16.10608 |
| C | 16.03690 | 14.10895 | 15.99861 |
| C | 10.03683 | 17.04414 | 10.67276 |
| C | 7.42946  | 10.69752 | 17.31908 |
| C | 16.70408 | 15.02430 | 16.84498 |
| C | 9.23650  | 18.21090 | 10.69193 |
| H | 6.94250  | 11.62662 | 17.67185 |
| H | 16.21065 | 15.37150 | 17.77228 |
| H | 9.38830  | 18.96561 | 11.48638 |
| C | 7.33117  | 9.49890  | 18.05166 |
| C | 18.00001 | 15.45803 | 16.50535 |
| C | 8.26974  | 18.39797 | 9.68532  |
| H | 6.75490  | 9.48696  | 18.99907 |
| H | 18.53167 | 16.16226 | 17.17588 |
| H | 7.64557  | 19.31453 | 9.69518  |
| C | 7.94012  | 8.31554  | 17.59833 |
| C | 18.64325 | 15.00055 | 15.34084 |
| C | 8.08969  | 17.44946 | 8.66294  |
| H | 7.84577  | 7.37357  | 18.17272 |
| H | 19.67156 | 15.33272 | 15.10292 |
| H | 7.34147  | 17.61377 | 7.86332  |
| C | 8.69489  | 8.31713  | 16.39565 |
| C | 17.97231 | 14.10084 | 14.47473 |

|   |          |          |          |
|---|----------|----------|----------|
| C | 8.87328  | 16.26590 | 8.64444  |
| C | 8.80111  | 9.52732  | 15.67318 |
| C | 16.67225 | 13.67389 | 14.81690 |
| C | 9.83029  | 16.07736 | 9.66635  |
| H | 9.39141  | 9.53966  | 14.73341 |
| H | 16.14811 | 12.96339 | 14.14507 |
| H | 10.44810 | 15.15501 | 9.65719  |
| C | 11.82713 | 10.21879 | 17.71118 |
| C | 15.52210 | 16.74189 | 13.03049 |
| C | 7.11569  | 14.41985 | 11.57588 |
| C | 11.31170 | 9.58857  | 18.86784 |
| C | 16.56426 | 17.60118 | 13.45533 |
| C | 6.10874  | 15.27389 | 11.06672 |
| H | 11.51404 | 8.51534  | 19.04481 |
| H | 17.49013 | 17.70096 | 12.85459 |
| H | 5.55969  | 14.98769 | 10.14915 |
| C | 10.55944 | 10.34681 | 19.78494 |
| C | 16.40992 | 18.34731 | 14.63981 |
| C | 5.82015  | 16.47321 | 11.74538 |
| H | 10.15951 | 9.85556  | 20.69452 |
| H | 17.23062 | 19.01364 | 14.97326 |
| H | 5.03471  | 17.14612 | 11.34579 |
| C | 10.31375 | 11.71492 | 19.57169 |
| C | 15.23238 | 18.26202 | 15.40264 |
| C | 6.51005  | 16.83440 | 12.91602 |
| H | 9.73890  | 12.30868 | 20.30825 |
| H | 15.11836 | 18.85709 | 16.32946 |
| H | 6.26686  | 17.77380 | 13.44905 |
| C | 10.80417 | 12.35244 | 18.40234 |
| C | 14.17957 | 17.40401 | 14.99036 |
| C | 7.53695  | 15.99619 | 13.42463 |
| C | 11.54945 | 11.58236 | 17.48132 |
| C | 14.35197 | 16.64252 | 13.81437 |
| C | 7.83057  | 14.80150 | 12.73078 |
| H | 11.93848 | 12.07353 | 16.56515 |
| H | 13.53654 | 15.95964 | 13.49671 |
| H | 8.63196  | 14.14106 | 13.12222 |
| C | 16.55540 | 8.30966  | 14.55895 |
| C | 14.53765 | 14.77369 | 7.47249  |
| C | 7.55622  | 8.56818  | 10.62165 |
| C | 15.28830 | 7.69140  | 14.54038 |
| C | 15.53138 | 14.24633 | 8.32464  |
| C | 7.85128  | 9.54820  | 9.65036  |
| H | 14.37344 | 8.31043  | 14.43257 |

|   |          |          |          |
|---|----------|----------|----------|
| H | 15.27157 | 14.00953 | 9.37596  |
| H | 8.46515  | 10.42882 | 9.93066  |
| C | 15.15079 | 6.29066  | 14.67141 |
| C | 16.85004 | 14.01900 | 7.87506  |
| C | 7.37922  | 9.44428  | 8.32324  |
| C | 16.32335 | 5.49930  | 14.78205 |
| C | 17.16952 | 14.32882 | 6.52850  |
| C | 6.60969  | 8.30480  | 7.96949  |
| H | 16.22724 | 4.39992  | 14.86834 |
| H | 18.19755 | 14.15617 | 6.15755  |
| H | 6.24064  | 8.20484  | 6.93023  |
| C | 17.58771 | 6.11252  | 14.77179 |
| C | 16.17351 | 14.83232 | 5.67089  |
| C | 6.33806  | 7.31258  | 8.92825  |
| H | 18.50070 | 5.48793  | 14.84131 |
| H | 16.42855 | 15.05484 | 4.61615  |
| H | 5.75133  | 6.41805  | 8.63601  |
| C | 17.71653 | 7.51040  | 14.67406 |
| C | 14.86009 | 15.05637 | 6.12584  |
| C | 6.79980  | 7.43078  | 10.25370 |
| H | 18.71533 | 7.98119  | 14.70443 |
| H | 14.08087 | 15.44810 | 5.44428  |
| H | 6.58736  | 6.64794  | 11.00639 |
| C | 10.60987 | 7.38911  | 8.25914  |
| C | 15.74949 | 6.75708  | 10.88700 |
| C | 15.00519 | 10.90244 | 6.64593  |
| C | 10.68458 | 6.96140  | 9.60270  |
| C | 16.53402 | 7.92673  | 10.81977 |
| C | 13.67534 | 11.35963 | 6.54812  |
| H | 11.23176 | 7.57693  | 10.34704 |
| H | 16.03953 | 8.91582  | 10.73005 |
| H | 13.01631 | 11.32403 | 7.44093  |
| C | 10.10323 | 5.74429  | 10.02431 |
| C | 17.94176 | 7.86262  | 10.84561 |
| C | 13.14848 | 11.83389 | 5.32676  |
| C | 9.41154  | 4.95835  | 9.06588  |
| C | 18.57047 | 6.59858  | 10.95731 |
| C | 14.00692 | 11.89053 | 4.19869  |
| H | 8.95624  | 4.00039  | 9.38361  |
| H | 19.67619 | 6.53264  | 10.97665 |
| H | 13.61043 | 12.26567 | 3.23589  |
| C | 9.30769  | 5.39862  | 7.73502  |
| C | 17.78674 | 5.43466  | 11.05321 |
| C | 15.34556 | 11.47068 | 4.30669  |

|    |          |          |          |
|----|----------|----------|----------|
| H  | 8.75451  | 4.78116  | 6.99888  |
| H  | 18.28877 | 4.45174  | 11.14824 |
| H  | 16.01148 | 11.53026 | 3.42317  |
| C  | 9.90096  | 6.60520  | 7.31779  |
| C  | 16.38168 | 5.49840  | 11.02094 |
| C  | 15.85578 | 10.96793 | 5.51846  |
| H  | 9.83344  | 6.94352  | 6.26669  |
| H  | 15.76989 | 4.57848  | 11.08585 |
| H  | 16.90058 | 10.61143 | 5.59503  |
| Na | 18.52227 | 15.41837 | 10.95586 |
| Ag | 27.85165 | 12.33035 | 11.93239 |
| Ag | 26.95021 | 10.71180 | 14.13698 |
| Ag | 28.44921 | 9.52188  | 11.98025 |
| Ag | 29.70018 | 11.30674 | 13.82961 |
| Ag | 27.95002 | 13.65727 | 14.44207 |
| Ag | 25.71956 | 10.58302 | 11.46362 |
| Ag | 30.30109 | 11.52281 | 10.73684 |
| Ag | 25.26700 | 13.11245 | 12.86596 |
| Ag | 27.87571 | 11.13843 | 9.32856  |
| Ag | 29.96942 | 14.13590 | 12.47516 |
| Ag | 28.88183 | 13.77843 | 9.71267  |
| Ag | 27.30637 | 15.13081 | 12.09205 |
| Ag | 25.83933 | 13.19603 | 10.07281 |
| Ag | 27.53116 | 8.44085  | 16.05378 |
| Ag | 28.89095 | 7.05943  | 13.73412 |
| Ag | 30.47590 | 8.88585  | 15.52789 |
| Ag | 25.49283 | 12.73667 | 15.82313 |
| Ag | 26.67981 | 8.41017  | 9.74762  |
| Ag | 32.30319 | 12.29241 | 12.78885 |
| Ag | 28.60067 | 16.28160 | 15.91409 |
| Ag | 23.33908 | 11.92684 | 10.94994 |
| Ag | 31.95919 | 11.38201 | 8.17248  |
| Ag | 21.77617 | 13.64367 | 12.71506 |
| Ag | 29.39867 | 10.76281 | 6.69364  |
| Ag | 30.88555 | 16.63952 | 13.97717 |
| Ag | 28.21509 | 17.83678 | 13.35100 |
| Ag | 22.56799 | 13.97161 | 9.15507  |
| Ag | 30.32311 | 13.59797 | 6.96312  |
| Ag | 26.85474 | 15.91778 | 9.26638  |
| S  | 31.94782 | 11.08697 | 14.99704 |
| S  | 25.50024 | 10.20892 | 16.18826 |
| S  | 28.42737 | 7.14049  | 11.07149 |
| S  | 27.34860 | 14.12906 | 16.87328 |
| S  | 24.31371 | 8.55692  | 10.71665 |

|   |          |          |          |
|---|----------|----------|----------|
| S | 32.78368 | 10.94774 | 10.68433 |
| S | 23.55373 | 13.90825 | 14.58951 |
| S | 27.18809 | 9.49442  | 7.50964  |
| S | 32.41709 | 14.82492 | 12.74611 |
| S | 29.07624 | 15.69659 | 8.05455  |
| S | 26.55441 | 17.42085 | 11.26779 |
| S | 24.87083 | 14.71892 | 8.24517  |
| S | 29.32261 | 8.97015  | 17.74612 |
| S | 26.93257 | 6.22233  | 15.05370 |
| S | 31.33543 | 6.88785  | 14.25612 |
| S | 31.04786 | 16.41347 | 16.48040 |
| S | 21.41001 | 11.08390 | 12.50418 |
| S | 31.44625 | 9.29702  | 6.87865  |
| S | 27.01307 | 18.19823 | 15.50647 |
| S | 22.10252 | 11.56588 | 8.56264  |
| S | 32.80485 | 13.59580 | 7.30234  |
| S | 30.44987 | 18.68759 | 12.59130 |
| S | 21.37389 | 15.33866 | 10.85651 |
| S | 28.96857 | 12.63367 | 5.07655  |
| C | 31.97602 | 12.40312 | 16.21575 |
| C | 23.91254 | 9.74689  | 15.48513 |
| C | 29.79871 | 7.04543  | 9.91675  |
| C | 32.65801 | 12.17589 | 17.43480 |
| C | 23.11082 | 8.78458  | 16.14005 |
| C | 30.50075 | 5.82294  | 9.79307  |
| H | 33.05990 | 11.16945 | 17.65940 |
| H | 23.50282 | 8.25555  | 17.02943 |
| H | 30.26185 | 4.98123  | 10.47061 |
| C | 32.82063 | 13.24320 | 18.33901 |
| C | 21.81447 | 8.52364  | 15.65268 |
| C | 31.48443 | 5.69584  | 8.79318  |
| H | 33.35479 | 13.06711 | 19.29498 |
| H | 21.18099 | 7.76969  | 16.16091 |
| H | 32.03427 | 4.73858  | 8.68851  |
| C | 32.32411 | 14.52649 | 18.04858 |
| C | 21.30061 | 9.21525  | 14.54170 |
| C | 31.77575 | 6.75620  | 7.91695  |
| H | 32.46636 | 15.36257 | 18.75999 |
| H | 20.28020 | 9.01573  | 14.16144 |
| H | 32.53928 | 6.63853  | 7.12375  |
| C | 31.61973 | 14.76186 | 16.83837 |
| C | 22.09818 | 10.18173 | 13.87972 |
| C | 31.08905 | 7.99269  | 8.04100  |
| C | 31.44254 | 13.68122 | 15.94573 |

|   |          |          |          |
|---|----------|----------|----------|
| C | 23.40404 | 10.41482 | 14.35242 |
| C | 30.11611 | 8.11825  | 9.05658  |
| H | 30.88566 | 13.85684 | 15.00165 |
| H | 24.03777 | 11.15900 | 13.82918 |
| H | 29.57338 | 9.08046  | 9.16167  |
| C | 28.32979 | 12.96688 | 17.82446 |
| C | 24.30912 | 7.46166  | 12.13027 |
| C | 32.87020 | 9.24490  | 11.23909 |
| C | 28.84989 | 13.37889 | 19.07391 |
| C | 23.17398 | 6.65955  | 12.39796 |
| C | 33.82838 | 8.38537  | 10.65165 |
| H | 28.72291 | 14.42726 | 19.40427 |
| H | 22.27447 | 6.72751  | 11.75438 |
| H | 34.43660 | 8.74370  | 9.79925  |
| C | 29.51406 | 12.43795 | 19.88395 |
| C | 23.19929 | 5.76336  | 13.48360 |
| C | 33.99157 | 7.08578  | 11.16882 |
| H | 29.92388 | 12.75903 | 20.86268 |
| H | 22.30599 | 5.14309  | 13.69523 |
| H | 34.73805 | 6.40815  | 10.70739 |
| C | 29.66541 | 11.10101 | 19.47491 |
| C | 24.33779 | 5.64395  | 14.29967 |
| C | 33.22517 | 6.63050  | 12.25599 |
| H | 30.17479 | 10.36425 | 20.12586 |
| H | 24.35283 | 4.93063  | 15.14538 |
| H | 33.36678 | 5.60957  | 12.66019 |
| C | 29.16403 | 10.68234 | 18.21509 |
| C | 25.48164 | 6.44347  | 14.04316 |
| C | 32.24957 | 7.47792  | 12.84468 |
| C | 28.51175 | 11.63442 | 17.40217 |
| C | 25.44113 | 7.35177  | 12.96442 |
| C | 32.08072 | 8.77425  | 12.30997 |
| H | 28.11813 | 11.31204 | 16.41649 |
| H | 26.32945 | 7.98565  | 12.76495 |
| H | 31.31845 | 9.44113  | 12.76361 |
| C | 23.84335 | 15.65743 | 14.84141 |
| C | 25.60738 | 10.12837 | 6.94057  |
| C | 32.95146 | 15.23459 | 11.08276 |
| C | 25.14883 | 16.17001 | 14.97609 |
| C | 24.64095 | 10.61939 | 7.84441  |
| C | 32.61710 | 14.41977 | 9.98109  |
| H | 26.02055 | 15.49632 | 14.84432 |
| H | 24.88806 | 10.68527 | 8.92340  |
| H | 31.92610 | 13.56384 | 10.12508 |



|   |          |          |          |
|---|----------|----------|----------|
| C | 25.37683 | 17.53034 | 15.27673 |
| C | 23.35879 | 11.02145 | 7.41084  |
| C | 33.15036 | 14.65409 | 8.69453  |
| C | 24.25941 | 18.39052 | 15.42803 |
| C | 23.04833 | 10.92792 | 6.02987  |
| C | 34.02849 | 15.75612 | 8.52215  |
| H | 24.42647 | 19.45984 | 15.65912 |
| H | 22.04910 | 11.24039 | 5.67153  |
| H | 34.45229 | 15.95694 | 7.51934  |
| C | 22.95755 | 17.88574 | 15.26415 |
| C | 24.01595 | 10.45275 | 5.12589  |
| C | 34.33522 | 16.59150 | 9.61086  |
| H | 22.08999 | 18.56698 | 15.36205 |
| H | 23.76945 | 10.39581 | 4.04742  |
| H | 35.00264 | 17.46366 | 9.45611  |
| C | 22.73616 | 16.52772 | 14.97121 |
| C | 25.29301 | 10.05360 | 5.56453  |
| C | 33.80675 | 16.34541 | 10.89294 |
| H | 21.70922 | 16.13756 | 14.83604 |
| H | 26.05183 | 9.68713  | 4.84724  |
| H | 34.04576 | 17.00806 | 11.74643 |
| C | 30.06702 | 16.94775 | 8.87248  |
| C | 24.77625 | 17.57365 | 11.45042 |
| C | 25.45512 | 14.08966 | 6.67165  |
| C | 29.96437 | 17.19553 | 10.25781 |
| C | 23.89081 | 16.50013 | 11.21472 |
| C | 26.75229 | 13.54948 | 6.54883  |
| H | 29.33290 | 16.53545 | 10.88842 |
| H | 24.29399 | 15.48472 | 11.01885 |
| H | 27.37497 | 13.40652 | 7.45654  |
| C | 30.62584 | 18.28573 | 10.86475 |
| C | 22.49067 | 16.69946 | 11.20392 |
| C | 27.29337 | 13.21239 | 5.28850  |
| C | 31.42687 | 19.12869 | 10.05072 |
| C | 21.97533 | 17.99277 | 11.45667 |
| C | 26.48395 | 13.39043 | 4.13671  |
| H | 31.94655 | 19.98782 | 10.51750 |
| H | 20.88043 | 18.16203 | 11.44001 |
| H | 26.89624 | 13.12979 | 3.14282  |
| C | 31.55333 | 18.86715 | 8.67510  |
| C | 22.85892 | 19.05596 | 11.72513 |
| C | 25.17605 | 13.89226 | 4.26278  |
| H | 32.18330 | 19.53021 | 8.04813  |
| H | 22.44971 | 20.06392 | 11.93526 |

|    |          |          |          |
|----|----------|----------|----------|
| H  | 24.55036 | 14.02066 | 3.35694  |
| C  | 30.88220 | 17.78505 | 8.07438  |
| C  | 24.25145 | 18.85980 | 11.72500 |
| C  | 24.65051 | 14.24959 | 5.51944  |
| H  | 30.97197 | 17.58540 | 6.98990  |
| H  | 24.94307 | 19.69991 | 11.92544 |
| H  | 23.63033 | 14.66710 | 5.61340  |
| Na | 21.64199 | 9.35531  | 10.27244 |
